# Supplementary material for: Femtosecond laser regulatory focus ablation patterning of a fluorescent film up to 1/10 of the scale of the diffraction limit
Source: Royal Society of Chemistry journal article supplement (doi:10.1039/d2nr06946f), 2023-01-01
Supplement: d2nr06946f1.pdf [file d2nr06946f1.pdf]

## Supporting Information

### Femtosecond laser regulatory focus ablation patterning of fluorescent film up to 1/10 the scale of the diffraction limit

Shu-Yu Liang,<sup>a</sup> Yue-Feng Liu,<sup>\*a</sup> Jian-Guan Hua,<sup>a</sup> Zhi-Kun Ji,<sup>a</sup> and Hong Xia<sup>\*a</sup>

<sup>a</sup>State Key Laboratory of Integrated Optoelectronics, College of Electronic Science and Engineering,  
Jilin University, 2699 Qianjin Street, Changchun 130012, China

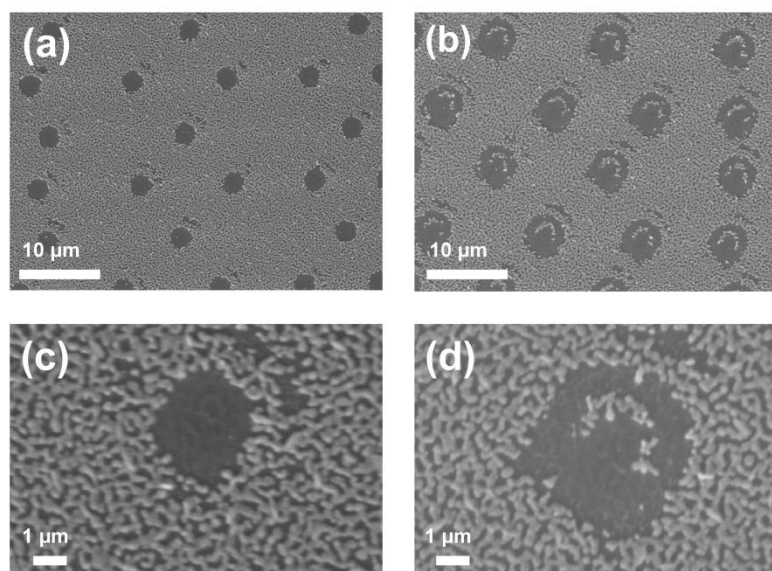

**Fig. S1** SEM images and high-magnification SEM images of the microholes fabricated via for FsLRFA patterning technique.

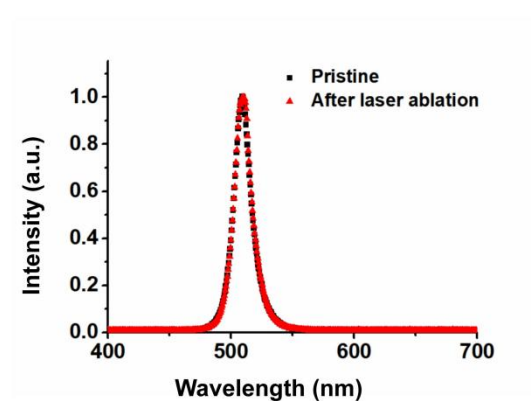

**Fig. S2** The PL spectra of the pristine and laser ablated CsPbBr<sub>3</sub> perovskite films.

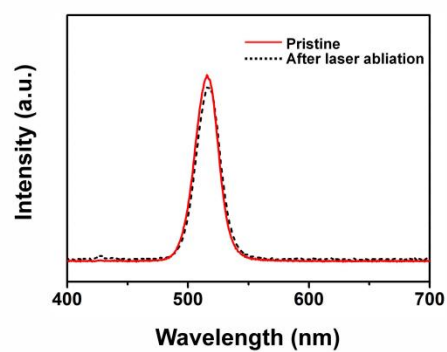

**Fig. S3** The PL spectra of the pristine and laser ablated CdSe/ZnS QDs films.

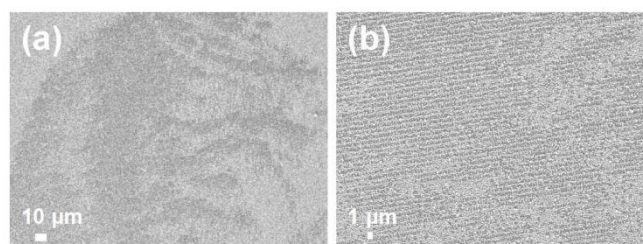

**Fig. S4** The SEM images (a) and high-magnification SEM images (b) of the part of cat.

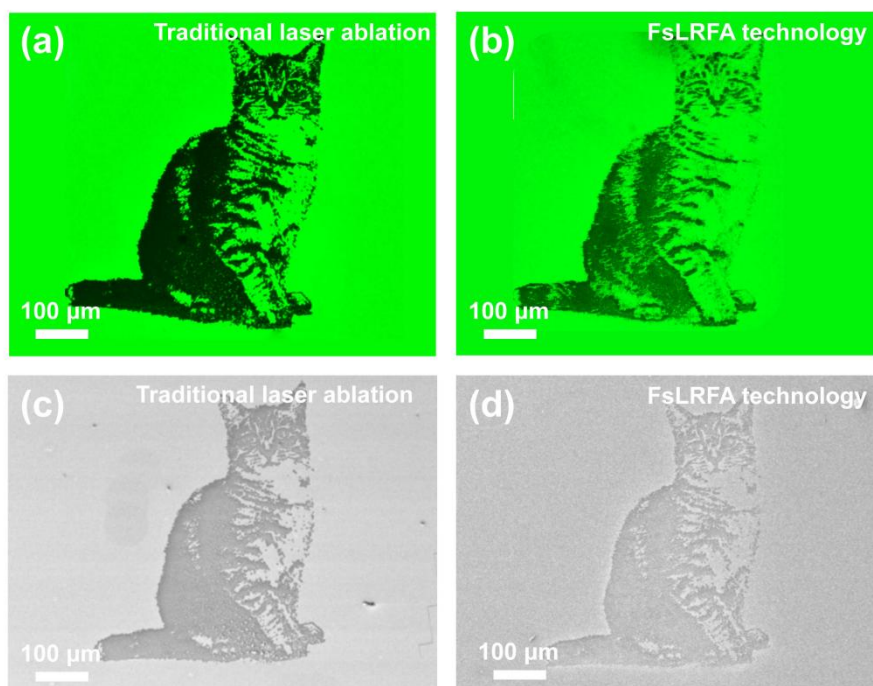

**Fig. S5** The fluorescence images (a-b) and SEM images (c-d) of patterned QDs films in traditional laser ablation and FsLRFA process.
